# Supplementary material for: Reduced DICER1 Elicits an Interferon Response in Endometrial Cancer Cells
Source: Oxford University Press journal article supplement (doi:10.1158/1541-7786.mcr-11-0520), 2012-01-17
Supplement: 15417786mcr110520-sup-dicer1_table_s3.xls [file 15417786mcr110520-sup-dicer1_table_s3.xls]

## Sheet: Supplementary Table 3 GO_enrich
	Supplemental Table 3. Gene Ontology enrichment for genes with increased expression in shDcr cells (from Table S2).
	GO Category	Function	P value	Genes
	GO:0009615	response to virus	2.95e-05	(ifi16 mx1 irf9 ifi44 isg15 ddx58 stat1 ifih1)
	GO:0051707	response to other organism	0.0053	(ifi16 mx1 irf9 ifi44 isg15 ddx58 stat1 ifih1)
	GO:0009607	response to biotic stimulus	0.00837	(dnajb2 ifi44 isg15 ddx58 stat1 ifih1 mx1 ifi16 irf9)
	GO:0005740	mitochondrial envelope	0.00837	(c3orf31 bid sdha vdac2 bad htra2 fahd1 sfxn5 kmo ndufa5 timm8b)
	GO:0031966	mitochondrial membrane	0.0154	(c3orf31 bid sdha vdac2 bad fahd1 sfxn5 kmo ndufa5 timm8b)
	GO:0005739	mitochondrion	2.33e-05	(bid sdha mrpl54 bad htra2 gstz1 timm8b decr1 c3orf31 vdac2 casp8 aass oxr1 fahd1 sfxn5 rsad1 kmo ndufa5 ifi6 pecr)
	GO:0005062	signal transducer activity	0.0144	(sp110 stat1)
	GO:0006351	transcription, DNA-dependent	0.0144	(zkscan5 sap30l tarbp2 meox1 elf1 sp100 slc2a4rg c10orf137 e2f5 tsc22d1 znf673 snapc3 ybx2 zhx3 znfx1 l3mbtl2 znf687 xrcc6 parp14 psip1 znf684 gon4l polr3h stat1 arntl2 sp110 meis1 znf143 scmh1 pms1 ssx1 epas1 znf33a itgb3bp rnf2 ifi16 irf9 twist1 gtf2e1)
	GO:0008632	apoptotic process	0.0144	(bad bid casp8 ifi6 stat1)
	GO:0008219	cell death	0.0144	(bid casp8 atg12 stat1 ifih1 itgb3bp bcar1 bad htra2 mx1 ifi16 pla2g6 pik3r2 ifi6 pecr)
	GO:0051704	multi-organism process	0.0154	(ifi44 isg15 ddx58 stat1 ifih1 mx1 ifi16 irf9 col16a1)
	GO:0006355	regulation of transcription, DNA-dependent	0.0154	(zkscan5 sap30l tarbp2 meox1 elf1 sp100 slc2a4rg c10orf137 e2f5 tsc22d1 znf673 snapc3 ybx2 zhx3 znfx1 l3mbtl2 znf687 xrcc6 parp14 psip1 znf684 gon4l stat1 arntl2 sp110 meis1 znf143 scmh1 pms1 ssx1 epas1 znf33a itgb3bp ifi16 rnf2 irf9 twist1 gtf2e1)
	GO:0043170	macromolecule metabolic process	0.019	(abhd5 sdha psmb9 h2afy2 ngly1 tarbp2 xpc meox1 fgfr2 poll c10orf137 ephb1 stk19 e2f5 znf673 ybx2 zhx3 svil man2b1 nudt1 l3mbtl2 xrcc6 rps12 psip1 rnps1 znf684 b3gnt1 aarsd1 camk2b ap4m1 znf143 rplp1 scmh1 dnajb2 rpusd2 pstk ppil6 csk aass epas1 anapc1 p4ha2 znf33a hist1h2bc itgb3bp ifi16 ap2m1 herc6 ehmt1 rnf123 zkscan5 sap30l elf1 dnajb14 sp100 slc2a4rg c1r dtl ppil2 tsc22d1 casp8 atg4b snapc3 …
	There were no GO categories significantly (p< 0.05) enriched for genes with decreased expression in shDcr cells (from Table S2). Very general categories (i.e., "cytoplasm" or "biological process") were omitted.
	Analyzed using GOstat: Find statistically overrepresented Gene Ontologies within a group of genes (Beissbarth T and Speed TP. Bioinformatics, 6.2004; 20(9): 1464-1465.)
