# Supplementary material for: Reduced DICER1 Elicits an Interferon Response in Endometrial Cancer Cells
Source: Oxford University Press journal article supplement (doi:10.1158/1541-7786.mcr-11-0520), 2012-01-17
Supplement: 15417786mcr110520-sup-stab_1.xls [file 15417786mcr110520-sup-stab_1.xls]

## Sheet: Sheet1
	Supplemental Table 1. Nanostring ä normalized miRNA expression.
	MicroRNA	Accession	KLE shLuc	KLE shDcrA	KLE shDcr3	AN3CA wt
	hsa-miR-16	nmiR00181.1	4942.09	4780.57	2958.84	2265.15
	hsa-miR-92a	nmiR00668.1	5884.2	5517.12	2984.64	743.645
	hsa-let-7b	nmiR00002.1	6149.07	4498.16	2399.21	151.617
	hsa-miR-21	nmiR00238.1	2802.96	2021.51	5964.49	1435.85
	hsa-miR-19b	nmiR00225.1	4136.26	4067.62	2461.49	1102.83
	hsa-miR-125b	nmiR00075.1	2032.93	2682.7	1949.84	3414.99
	hsa-let-7a	nmiR00001.1	4145.2	3986.63	1658.56	1184.06
	hsa-miR-1274a	nmiR00092.1	1830.64	1915.92	2535.27	1882.58
	hsa-miR-20a+hsa-miR-20b	nmiR00236.1	3603.16	3175.78	1979.54	760.793
	hsa-miR-99a	nmiR00686.1	2435.27	3316.22	1895.22	27.0745
	hsa-miR-24	nmiR00261.1	4383.25	1798.03	2621.5	1071.25
	hsa-miR-26a	nmiR00263.1	2563.79	3081.47	1920.14	1096.52
	hsa-miR-103	nmiR00012.1	3248.88	1319.31	1604.9	1499.93
	hsa-let-7i	nmiR00008.1	2426.32	1118.39	2690.49	112.81
	hsa-miR-1260	nmiR00077.1	1289.72	1579.69	1607.78	1263.48
	hsa-miR-135a	nmiR00142.1	2351.45	3015.86	1175.65	1
	hsa-miR-29a	nmiR00275.1	1265.13	1564.31	1768.75	1238.21
	hsa-let-7c	nmiR00003.1	1946.87	1883.12	835.508	57.7589
	hsa-let-7g	nmiR00007.1	1703.23	1552.01	988.812	146.202
	hsa-miR-1274b	nmiR00093.1	862.793	1056.88	1089.42	961.144
	hsa-miR-145	nmiR00156.1	3386.35	2588.39	1536.87	27.977
	hsa-miR-23a	nmiR00259.1	1564.65	1412.6	1171.82	336.626
	hsa-miR-30a	nmiR00287.1	943.26	1419.77	1398.9	50.539
	hsa-miR-143	nmiR00154.1	4207.79	1499.73	1116.25	1
	hsa-miR-335	nmiR00310.1	1	1	1	5212.74
	hsa-miR-221	nmiR00255.1	1252.84	957.448	1068.34	748.158
	hsa-let-7d	nmiR00004.1	1424.95	758.578	465.662	85.7358
	hsa-miR-30c	nmiR00289.1	1191.37	1376.72	751.191	77.6135
	hsa-miR-181a	nmiR00183.1	1284.13	1195.27	1527.29	57.7589
	hsa-miR-96	nmiR00684.1	905.262	910.294	776.103	738.231
	hsa-miR-23b	nmiR00260.1	1276.31	847.762	765.563	181.399
	hsa-miR-25	nmiR00262.1	789.031	1081.49	715.739	506.293
	hsa-miR-125a-5p	nmiR00074.1	943.26	894.917	781.852	360.09
	hsa-miR-15a	nmiR00179.1	762.208	493.076	349.725	535.172
	hsa-miR-106b	nmiR00016.1	658.27	437.72	422.545	367.31
	hsa-let-7e	nmiR00005.1	705.21	465.398	368.888	161.544
	hsa-miR-15b	nmiR00180.1	469.395	608.913	343.018	317.674
	hsa-miR-100	nmiR00010.1	264.873	390.565	205.044	1061.32
	hsa-miR-450a	nmiR00374.1	833.735	459.247	313.316	57.7589
	hsa-miR-148a	nmiR00166.1	668.329	423.369	595.012	67.6862
	hsa-miR-30b	nmiR00288.1	419.103	509.477	326.73	258.11
	hsa-miR-27a	nmiR00265.1	640.389	511.528	593.096	203.059
	hsa-miR-93	nmiR00670.2	421.338	310.607	262.534	374.53
	hsa-miR-99b	nmiR00687.1	501.806	237.824	355.474	222.913
	hsa-miR-191	nmiR00204.1	326.341	430.544	386.135	185.009
	hsa-miR-1979	nmiR00695.1	284.99	385.44	249.119	104.688
	hsa-miR-222	nmiR00256.1	363.222	474.624	561.477	73.1011
	hsa-miR-544	nmiR00478.1	131.978	469.98	1	910.361
	hsa-miR-146a	nmiR00159.1	410.162	392.615	422.545	37.0018
	hsa-miR-135b	nmiR00143.1	506.276	332.134	301.818	1
	hsa-let-7f	nmiR00006.1	447.043	441.82	157.137	85.7358
	hsa-miR-361-5p	nmiR00329.1	333.047	302.406	184.923	88.4433
	hsa-miR-196a	nmiR00217.1	57.5735	111.475	32.6107	790.534
	hsa-miR-374a	nmiR00342.1	273.814	297.281	103.48	207.571
	hsa-miR-196b	nmiR00218.1	269.343	161.967	140.848	230.133
	hsa-miR-30e	nmiR00291.1	220.169	331.109	250.078	43.3192
	hsa-miR-423-3p	nmiR00363.1	189.993	210.147	151.388	245.475
	hsa-miR-301a	nmiR00279.1	329.694	96.3599	131.267	103.785
	hsa-miR-151-5p	nmiR00171.1	163.171	196.82	220.375	134.47
	hsa-miR-484	nmiR00385.1	291.695	223.473	162.886	118.225
	hsa-miR-98	nmiR00685.1	319.636	137.364	108.271	38.8067
	hsa-miR-107	nmiR00017.1	242.521	87.134	103.48	213.888
	hsa-miR-424	nmiR00365.1	236.933	247.05	191.63	1
	hsa-miR-132	nmiR00134.1	155.347	180.419	130.309	239.158
	hsa-miR-29c	nmiR00277.1	147.524	199.896	153.304	85.7358
	hsa-miR-423-5p	nmiR00364.1	134.113	138.389	152.346	151.617
	hsa-miR-125a-3p	nmiR00073.1	129.642	154.791	139.89	218.401
	hsa-miR-374b	nmiR00343.1	175.464	174.268	53.6565	122.738
	hsa-miR-19a	nmiR00224.1	179.935	225.523	111.146	84.8333
	hsa-miR-133a	nmiR00139.1	51.5776	166.528	189.091	267.631
	hsa-miR-106a+hsa-miR-17	nmiR00015.1	231.345	176.318	129.35	70.3936
	hsa-miR-26b	nmiR00264.1	155.347	245	70.9032	76.711
	hsa-miR-148b	nmiR00167.1	248.109	100.46	105.397	105.59
	hsa-miR-340	nmiR00319.2	155.347	92.2595	63.238	193.131
	hsa-miR-342-3p	nmiR00320.1	187.758	140.439	138.932	26.172
	hsa-miR-664	nmiR00622.1	155.347	111.736	137.974	89.3458
	hsa-miR-10a	nmiR00018.1	156.465	129.163	68.9869	175.984
	hsa-miR-216a	nmiR00244.1	56.998	105.586	70.9032	202.156
	hsa-miR-92b	nmiR00669.1	145.289	168.117	122.643	96.5656
	hsa-miR-1308	nmiR00131.2	136.348	190.67	68.0288	1
	hsa-miR-331-3p	nmiR00308.1	135.23	90.2093	101.564	116.42
	hsa-miR-744	nmiR00632.1	77.1149	89.1842	94.857	135.372
	hsa-miR-590-5p	nmiR00545.1	106.206	192.197	112.171	289.616
	hsa-miR-140-5p	nmiR00150.1	109.525	134.289	115.936	69.4911
	hsa-miR-378	nmiR00349.1	110.643	108.661	96.7733	30.6844
	hsa-miR-18a	nmiR00198.1	139.701	85.0838	102.522	101.078
	hsa-miR-183	nmiR00191.1	136.348	77.908	79.5266	93.8582
	hsa-miR-542-3p	nmiR00475.1	172.111	116.862	83.3592	72.1986
	hsa-miR-708	nmiR00630.1	89.4086	96.3599	120.727	99.2731
	hsa-miR-1297	nmiR00120.1	89.4086	104.561	118.811	127.25
	hsa-miR-200a	nmiR00226.1	96.1142	103.536	92.9407	80.3209
	hsa-miR-128	nmiR00100.1	148.642	113.787	83.3592	90.2482
	hsa-miR-425	nmiR00366.1	94.9966	94.3097	68.0288	66.7837
	hsa-miR-193b	nmiR00214.1	43.5867	54.3306	96.7733	190.424
	hsa-miR-199a-3p+hsa-miR-199b-3p	nmiR00221.1	27.9402	25.6276	23.9538	407.02
	hsa-miR-453	nmiR00379.1	94.9966	75.8578	111.146	111.908
	hsa-miR-130a	nmiR00132.1	127.407	80.9833	74.7358	109.2
	hsa-miR-574-3p	nmiR00525.1	138.583	158.891	124.56	23.4645
	hsa-miR-22	nmiR00251.1	75.9973	127.113	160.011	72.1986
	hsa-miR-186	nmiR00194.1	87.1733	111.736	105.397	54.1489
	hsa-miR-29b	nmiR00276.1	86.0557	111.736	86.2336	108.298
	hsa-miR-130b	nmiR00133.1	127.407	74.8327	96.7733	90.2482
	hsa-miR-455-3p	nmiR00381.1	106.173	69.7072	68.9869	161.544
	hsa-miR-126	nmiR00076.1	79.3501	80.9833	69.9451	98.3706
	hsa-miR-345	nmiR00322.1	138.583	68.6821	59.4054	76.711
	hsa-miR-324-5p	nmiR00301.1	125.172	66.6319	64.1961	73.1011
	hsa-miR-1246	nmiR00058.1	44.7043	75.8578	66.1125	127.25
	hsa-miR-450b-5p	nmiR00376.1	145.289	85.0838	66.1125	44.2216
	hsa-miR-660	nmiR00617.1	110.643	84.0586	55.5728	84.8333
	hsa-miR-101	nmiR00011.1	73.7621	87.134	58.4472	32.4894
	hsa-miR-362-3p	nmiR00330.1	87.1733	89.1842	42.1587	81.2234
	hsa-miR-151-3p	nmiR00170.1	81.5853	68.6821	108.271	55.9539
	hsa-miR-218	nmiR00247.1	103.937	95.3348	87.1918	21.6596
	hsa-miR-655	nmiR00612.2	74.8797	65.6067	72.8195	66.7837
	hsa-miR-582-5p	nmiR00536.1	29.0578	59.4561	1	116.42
	hsa-miR-181b+hsa-miR-181d	nmiR00184.1	121.819	86.1089	98.6896	21.6596
	hsa-miR-523	nmiR00463.1	58.1156	66.6319	79.5266	57.7589
	hsa-miR-296-5p	nmiR00270.1	1	23.5774	22.9956	203.961
	hsa-miR-503	nmiR00412.1	126.29	70.7323	68.9869	25.2695
	hsa-miR-9	nmiR00662.2	55.8803	67.657	46.9494	39.7092
	hsa-miR-188-5p	nmiR00197.1	61.4684	59.4561	62.2798	61.3688
	hsa-miR-197	nmiR00219.1	64.8212	83.0335	35.4516	49.6365
	hsa-miR-34b	nmiR00325.1	58.1156	55.3557	67.0706	56.8564
	hsa-miR-383	nmiR00354.1	72.6445	105.586	74.7358	64.0762
	hsa-miR-885-5p	nmiR00651.1	64.8212	61.5063	58.4472	59.5638
	hsa-miR-454	nmiR00380.1	99.467	71.7574	47.9076	34.2943
	hsa-miR-32	nmiR00293.2	72.6445	39.9791	46.9494	73.1011
	hsa-miR-526a+hsa-miR-518d-5p+ hsa-miR-520c-5p	nmiR00468.1	75.9973	71.7574	63.238	43.3192
	hsa-miR-532-5p	nmiR00472.1	79.3501	59.4561	60.3635	45.1241
	hsa-miR-615-5p	nmiR00570.1	54.7627	51.2553	74.7358	54.1489
	hsa-miR-651	nmiR00607.1	71.5268	60.4812	50.782	44.2216
	kshv-miR-K12-6-5p	nmiR00795.1	39.1162	36.9038	46.9494	66.7837
	hsa-miR-199a-5p	nmiR00222.1	1	1	1	254.5
	hsa-miR-600	nmiR00554.1	50.2923	58.431	46.9494	53.2465
	hsa-miR-598	nmiR00552.1	101.702	53.3055	44.075	32.4894
	hsa-miR-30d	nmiR00290.1	51.4099	63.5565	62.2798	28.8794
	hsa-miR-31	nmiR00292.1	51.4099	77.908	100.606	1
	hsa-miR-490-3p	nmiR00394.1	54.7627	34.8536	86.2336	1
	hsa-miR-518f	nmiR00444.1	52.5275	51.2553	55.5728	46.9291
	hsa-miR-603	nmiR00557.1	50.2923	52.2804	49.8239	37.0018
	hsa-miR-320a	nmiR00294.2	55.8803	52.2804	57.4891	51.4415
	hsa-miR-210	nmiR00239.1	33.5282	45.1046	34.4935	46.9291
	hsa-miR-361-3p	nmiR00328.1	53.6451	63.5565	55.5728	28.8794
	hsa-miR-2117	nmiR00704.1	36.881	45.1046	55.5728	41.5142
	hsa-miR-485-3p	nmiR00386.1	1	59.1947	35.4851	165.114
	hsa-miR-328	nmiR00304.1	44.7043	55.3557	56.5309	27.977
	hsa-miR-520d-5p+hsa-miR-527+ hsa-miR-518a-5p	nmiR00456.1	50.2923	52.2804	50.782	64.9787
	hsa-miR-146b-5p	nmiR00161.1	42.4691	58.431	56.5309	25.2695
	hsa-miR-2276	nmiR00705.1	48.0571	47.1548	60.3635	36.0993
	hsa-miR-517c+hsa-miR-519a	nmiR00438.1	31.293	1	22.9956	142.592
	hsa-miR-362-5p	nmiR00331.1	56.998	41.0042	32.5772	45.1241
	ebv-miR-BART6-5p	nmiR00746.1	52.5275	50.2302	45.0331	35.1968
	hsa-miR-574-5p	nmiR00526.1	52.5275	49.2051	45.0331	28.8794
	hsa-miR-1206	nmiR00035.1	44.7043	38.954	38.3261	40.6117
	hsa-miR-548b-3p	nmiR00482.1	40.2339	47.1548	36.4098	49.6365
	hsa-miR-532-3p	nmiR00471.1	46.9395	43.0544	38.3261	42.4167
	hsa-miR-498	nmiR00404.1	42.4691	47.1548	51.7402	37.9043
	hsa-miR-635	nmiR00591.1	53.6451	44.0795	35.4516	30.6844
	hsa-miR-509-3p	nmiR00420.1	39.1162	56.3808	45.9913	31.5869
	hsa-miR-194	nmiR00215.1	33.5282	54.3306	66.1125	24.367
	hsa-miR-185	nmiR00193.1	33.5282	37.9289	34.4935	54.1489
	hsa-miR-561	nmiR00513.1	50.2923	38.954	42.1587	39.7092
	hsa-miR-301b	nmiR00280.1	39.1162	33.8285	32.5772	20.7571
	hsa-miR-181c	nmiR00185.1	61.4684	59.4561	54.6146	1
	hsa-miR-640	nmiR00596.1	29.0578	38.954	31.619	35.1968
	hsa-miR-363	nmiR00332.1	51.4099	43.0544	37.3679	30.6844
	hsa-miR-122	nmiR00039.1	37.9986	33.8285	25.8701	27.0745
	hsa-miR-548i	nmiR00492.1	24.5874	33.8285	29.7027	55.9539
	hsa-miR-324-3p	nmiR00300.1	45.8219	23.5774	24.9119	45.1241
	hsa-miR-508-3p	nmiR00417.1	31.293	37.9289	37.3679	36.0993
	hsa-miR-302a	nmiR00281.1	1	1	1	139.885
	hsa-miR-142-5p	nmiR00153.1	27.9402	45.1046	38.3261	43.3192
	hsa-miR-548a-5p	nmiR00481.1	26.8226	39.9791	35.4516	34.2943
	hsa-miR-302c	nmiR00283.1	42.4691	47.1548	33.5353	41.5142
	hsa-miR-890	nmiR00657.1	54.7627	45.1046	32.5772	24.367
	ebv-miR-BART10	nmiR00721.1	41.3515	34.8536	31.619	53.2465
	hsa-miR-548a-3p	nmiR00480.1	1	34.8536	26.8282	45.1241
	hsa-miR-551b	nmiR00503.1	33.5282	30.7532	26.8282	26.172
	hsa-miR-10b	nmiR00019.1	26.8226	37.9289	30.6608	1
	hsa-miR-515-3p	nmiR00431.1	24.5874	34.8536	22.9956	24.367
	hsa-miR-630	nmiR00586.1	33.5282	31.7783	27.7864	37.0018
	kshv-miR-K12-12	nmiR00788.1	1	33.8285	25.8701	27.0745
	hsa-miR-539	nmiR00473.1	23.4697	41.0042	25.8701	41.5142
	hsa-miR-34a	nmiR00324.1	43.5867	32.8034	29.7027	1
	hsa-miR-379	nmiR00350.1	25.705	1	35.4516	29.7819
	hsa-miR-626	nmiR00581.1	23.4697	33.8285	35.4516	25.2695
	hsa-miR-34c-5p	nmiR00327.1	27.9402	45.1046	44.075	1
	hsa-miR-365	nmiR00333.1	35.7634	1	1	45.1241
	hsa-miR-580	nmiR00533.1	1	26.6527	29.7027	27.0745
	kshv-miR-K12-11	nmiR00787.1	26.8226	23.5774	22.0375	31.5869
	hsa-miR-592	nmiR00547.1	51.4099	36.9038	22.9956	1
	hsa-miR-203	nmiR00230.1	31.293	30.7532	34.4935	1
	hsa-miR-542-5p	nmiR00476.1	41.3515	28.703	22.9956	1
	hsa-miR-136	nmiR00144.1	1	25.6276	25.8701	28.8794
	hsa-miR-18b	nmiR00199.1	32.4106	1	30.6608	23.4645
	hsa-miR-569	nmiR00520.1	32.4106	35.8787	23.9538	28.8794
	hsa-miR-134	nmiR00141.1	31.293	33.8285	22.0375	20.7571
	hsa-miR-224	nmiR00258.1	34.6458	38.954	26.8282	26.172
	hsa-miR-493	nmiR00399.1	26.8226	1	28.7445	30.6844
	hcmv-miR-US5-2	nmiR00766.1	1	33.8285	26.8282	21.6596
	hsa-miR-649	nmiR00605.1	1	37.9289	43.1168	37.0018
	hsa-miR-421	nmiR00361.1	29.0578	24.6025	23.9538	34.2943
	hsa-miR-566	nmiR00517.1	25.705	28.703	27.7864	23.4645
	hsa-miR-526b	nmiR00469.1	31.293	30.7532	27.7864	26.172
	hsa-miR-188-3p	nmiR00196.1	34.6458	26.6527	29.7027	25.2695
	hsa-miR-495	nmiR00401.1	26.8226	27.6778	28.7445	23.4645
	hsa-miR-300	nmiR00278.1	1	35.8787	22.0375	24.367
	hsa-miR-190b	nmiR00203.1	32.4106	32.8034	43.1168	1
	hsv1-miR-H8	nmiR00779.1	23.4697	32.8034	24.9119	26.172
	hsa-miR-641	nmiR00597.2	33.5282	30.7532	23.9538	1
	hsa-miR-452	nmiR00378.1	23.4697	28.703	22.9956	20.7571
	hsa-miR-590-3p	nmiR00544.1	1	28.703	22.9956	27.977
	hsa-miR-1	nmiR00009.1	1	36.9038	30.6608	27.977
	hsa-miR-770-5p	nmiR00641.1	29.0578	1	33.5353	26.172
	hsa-miR-302e	nmiR00285.1	35.7634	29.7281	1	1
	hsa-miR-204	nmiR00231.2	23.4697	97.385	1	1
	hsa-miR-873	nmiR00643.2	1	1	1	84.8333
	hsa-miR-455-5p	nmiR00382.1	30.1754	1	22.9956	42.4167
	hsa-miR-548f	nmiR00489.1	1	26.6527	26.8282	22.5621
	hsa-miR-500+hsa-miR-501-5p	nmiR00407.1	33.5282	1	25.8701	1
	hsa-miR-520g	nmiR00459.1	23.4697	31.7783	1	36.0993
	kshv-miR-K12-4-5p	nmiR00792.1	23.4697	24.6025	22.9956	1
	hsa-miR-548h	nmiR00491.1	32.4106	24.6025	30.6608	27.0745
	hsa-miR-195	nmiR00216.1	26.8226	1	1	21.6596
	hsa-miR-1178	nmiR00020.1	61.4684	41.0042	23.9538	1
	ebv-miR-BART16	nmiR00728.1	26.8226	1	24.9119	21.6596
	hsa-miR-1276	nmiR00096.1	23.4697	39.9791	23.9538	27.977
	hsa-miR-320c (+++)	nmiR00296.1	1	1	1	90.0046
	hsa-miR-149	nmiR00168.1	35.7634	27.6778	27.7864	1
	hsa-miR-376a	nmiR00345.1	1	1	1	72.1986
	hsa-miR-766	nmiR00636.1	26.8226	1	1	49.6365
	hsa-miR-1912	nmiR00207.1	25.705	25.6276	25.8701	1
	hsa-miR-514	nmiR00430.1	25.705	1	1	27.977
	hsa-miR-520e	nmiR00457.1	1	29.7281	1	28.8794
	hsa-miR-346	nmiR00323.1	1	1	26.8282	22.5621
	hsa-miR-520a-3p	nmiR00451.1	1	35.8787	1	20.7571
	hsa-miR-95	nmiR00683.1	1	31.7783	1	1
	hsa-miR-422a	nmiR00362.1	24.5874	35.8787	1	22.5621
	hsa-miR-339-3p	nmiR00315.1	24.5874	1	23.9538	22.5621
	hsa-miR-499-5p	nmiR00406.1	29.0578	30.7532	24.9119	1
	hsa-miR-595	nmiR00549.1	1	31.7783	24.9119	1
	hsa-miR-1180	nmiR00022.1	34.6458	1	1	1
	hsa-miR-517b	nmiR00437.1	1	24.6025	30.6608	1
	hsa-miR-137	nmiR00145.1	27.9402	23.5774	22.9956	1
	hsa-miR-33b	nmiR00318.1	1	28.703	28.7445	33.3918
	hiv1-miR-N367	nmiR00768.1	27.9402	1	1	31.5869
	hsa-miR-497	nmiR00403.2	24.5874	1	1	20.7571
	hsa-miR-1975	nmiR00691.1	1	1	1	1
	hsa-miR-144	nmiR00155.1	1	1	26.8282	22.5621
	hsa-miR-1908	nmiR00201.1	35.7634	27.6778	1	24.367
	hsa-miR-876-3p	nmiR00647.1	1	1	1	69.4911
	hsa-miR-576-3p	nmiR00528.1	1	1	29.7027	27.0745
	hsa-miR-555	nmiR00507.1	1	1	26.8282	1
	hsa-miR-105	nmiR00014.1	27.9402	1	1	1
	hsa-miR-615-3p	nmiR00569.1	24.5874	1	1	39.7092
	hcmv-miR-US5-1	nmiR00765.1	1	1	22.0375	20.7571
	hsa-miR-670	nmiR00710.1	24.5874	1	1	20.7571
	kshv-miR-K12-6-3p	nmiR00794.1	1	1	22.0375	1
	hsa-miR-133b	nmiR00140.1	1	26.6527	1	21.6596
	hsv1-miR-H1	nmiR00771.1	1	1	1	1
	hcmv-miR-US33-3p	nmiR00762.1	25.705	29.7281	25.8701	1
	hsa-miR-337-5p	nmiR00312.1	24.5874	30.7532	1	24.367
	hsa-miR-320b	nmiR00295.1	1	26.6527	1	1
	hsa-miR-199b-5p	nmiR00223.2	23.4697	25.6276	1	21.6596
	hsa-miR-140-3p	nmiR00149.1	27.9402	25.6276	22.0375	1
	hsa-miR-490-5p	nmiR00395.1	33.5282	34.8536	22.0375	1
	hsa-miR-891a	nmiR00658.1	1	1	27.7864	20.7571
	ebv-miR-BART8	nmiR00748.1	1	1	22.9956	23.4645
	hsa-miR-1977	nmiR00693.1	24.5874	1	1	22.5621
	hsa-miR-581	nmiR00534.1	1	1	22.0375	1
	hsa-miR-577	nmiR00530.1	24.5874	1	1	22.5621
	hsa-miR-620	nmiR00575.1	1	23.5774	25.8701	1
	ebv-miR-BART2-3p	nmiR00735.1	1	29.7281	26.8282	22.5621
	ebv-miR-BHRF1-2	nmiR00751.1	1	25.6276	26.8282	22.5621
	hsa-miR-1261	nmiR00078.1	1	26.6527	23.9538	23.4645
	hsa-miR-609	nmiR00563.1	1	26.6527	1	31.5869
	hsa-miR-208a	nmiR00234.1	1	23.5774	24.9119	1
	hsa-miR-448	nmiR00371.2	25.705	1	1	1
	hsa-miR-519d	nmiR00449.1	1	1	24.9119	1
	hsa-miR-943	nmiR00681.1	29.0578	27.6778	1	1
	hsv1-miR-H3	nmiR00774.1	1	1	27.7864	20.7571
	hsa-miR-597	nmiR00551.1	23.4697	25.6276	1	1
	hsa-miR-767-5p	nmiR00638.1	25.705	30.7532	1	1
	hsa-miR-376c	nmiR00347.2	1	1	1	46.0266
	hsa-miR-138	nmiR00146.1	1	1	25.8701	28.8794
	hsa-miR-377	nmiR00348.1	1	1	1	54.1489
	hsa-miR-142-3p	nmiR00152.1	1	1	1	1
	hsa-miR-652	nmiR00608.1	1	26.6527	1	1
	hcmv-miR-UL70-3p	nmiR00757.1	1	1	1	22.5621
	hsa-miR-519b-3p	nmiR00446.1	1	1	25.8701	1
	hsa-miR-1271	nmiR00088.1	1	1	1	29.7819
	hsa-miR-570	nmiR00521.1	1	1	1	23.4645
	hsa-miR-409-3p	nmiR00356.1	27.9402	1	1	1
	hsa-miR-492	nmiR00398.1	1	32.8034	34.4935	26.172
	hsa-miR-1266	nmiR00083.1	1	28.703	1	1
	hsa-miR-1262	nmiR00079.1	1	23.5774	23.9538	23.4645
	hsa-miR-1252	nmiR00064.1	1	1	1	1
	hsa-miR-548g	nmiR00490.1	24.5874	1	1	1
	hsa-miR-1282	nmiR00103.1	1	25.6276	1	1
	hsa-miR-2115	nmiR00702.1	1	1	1	1
	hsa-miR-617	nmiR00572.1	1	1	1	1
	hsa-miR-591	nmiR00546.1	1	1	22.9956	1
	hsa-miR-323-5p	nmiR00299.1	1	24.6025	1	20.7571
	hsa-miR-373	nmiR00341.1	1	1	1	1
	hsa-miR-548d-3p	nmiR00486.1	1	24.6025	1	20.7571
	hsa-miR-571	nmiR00522.1	1	1	1	20.7571
	hsa-miR-190	nmiR00200.1	27.9402	1	1	1
	hsa-miR-1248	nmiR00060.1	1	1	22.9956	1
	hsa-miR-619	nmiR00574.1	23.4697	1	1	1
	hsa-miR-1287	nmiR00108.1	1	23.5774	1	1
	hsa-miR-7	nmiR00629.1	1	1	1	34.2943
	hsv1-miR-H4-5p	nmiR00776.1	1	1	1	1
	hsa-miR-369-3p	nmiR00335.1	1	23.5774	1	30.6844
	ebv-miR-BART21-5p	nmiR00740.1	1	25.6276	31.619	1
	hsa-miR-487a	nmiR00390.1	1	25.6276	28.7445	1
	hsa-miR-516a-3p	nmiR00433.1	1	1	1	1
	hsa-miR-573	nmiR00524.1	1	1	1	1
	hsa-miR-875-5p	nmiR00646.1	24.5874	1	24.9119	1
	hsa-miR-147	nmiR00162.1	1	1	1	28.8794
	hsa-miR-1974	nmiR00690.1	1	1	25.8701	1
	hsa-miR-214	nmiR00242.1	1	1	1	36.0993
	hsa-miR-522	nmiR00462.1	1	1	1	27.977
	hsa-miR-611	nmiR00565.1	1	26.6527	23.9538	1
	hsa-miR-1225-3p	nmiR00042.1	24.5874	1	22.0375	1
	hsa-miR-656	nmiR00613.1	24.5874	1	1	1
	hsa-miR-1298	nmiR00121.1	23.4697	1	1	21.6596
	hsa-miR-501-3p	nmiR00408.1	1	1	1	28.8794
	hsa-miR-521	nmiR00461.1	1	1	1	33.3918
	hsa-miR-449b	nmiR00373.1	1	24.6025	22.0375	1
	hsa-miR-215	nmiR00243.1	23.4697	1	1	22.5621
	hsa-miR-572	nmiR00523.1	1	1	1	1
	hsa-miR-155	nmiR00178.1	1	1	1	22.5621
	hsa-miR-525-5p	nmiR00467.1	1	1	1	20.7571
	hsa-miR-646	nmiR00602.1	1	1	1	23.4645
	hsa-miR-891b	nmiR00659.1	1	1	1	1
	hsa-miR-627	nmiR00582.1	1	1	22.0375	1
	hsa-miR-519e	nmiR00450.2	1	23.5774	1	1
	hsa-miR-551a	nmiR00502.1	1	39.9791	1	1
	hsa-miR-1179	nmiR00021.1	1	1	24.9119	1
	ebv-miR-BART18-3p	nmiR00731.1	1	25.6276	1	20.7571
	hsa-miR-769-5p	nmiR00640.1	1	1	1	20.7571
	hsa-miR-34c-3p	nmiR00326.1	1	23.5774	1	1
	hsa-miR-663b	nmiR00621.1	1	24.6025	1	1
	hsv2-miR-H2	nmiR00780.1	1	1	23.9538	1
	hsa-miR-1539	nmiR00176.1	1	1	22.0375	1
	hsa-miR-1915	nmiR00210.1	25.705	1	1	1
	hsa-miR-217	nmiR00246.1	1	1	1	23.4645
	hsa-miR-876-5p	nmiR00648.2	1	1	1	23.4645
	hsa-miR-886-5p	nmiR00653.1	1	1	1	20.7571
	hsa-miR-1181	nmiR00023.1	1	1	1	1
	hsa-miR-608	nmiR00562.1	1	1	1	1
	hsa-miR-449a	nmiR00372.1	1	1	1	20.7571
	hsa-miR-629	nmiR00585.1	1	1	24.9119	1
	hsa-miR-1279	nmiR00099.1	1	1	1	1
	hsa-miR-219-5p	nmiR00250.1	1	28.703	1	1
	hsa-miR-331-5p	nmiR00309.1	1	1	1	24.367
	hsa-miR-1288	nmiR00109.1	1	24.6025	27.7864	1
	hsa-miR-1275	nmiR00094.1	1	1	1	1
	hsa-miR-1299	nmiR00122.1	1	1	1	1
	hsa-miR-370	nmiR00337.1	1	1	1	24.367
	hsa-miR-758	nmiR00633.1	1	27.6778	1	1
	hsa-miR-802	nmiR00642.1	1	1	1	24.367
	hsa-miR-376b	nmiR00346.1	1	1	1	22.5621
	hsa-miR-409-5p	nmiR00357.1	1	1	1	26.172
	hsa-miR-302f	nmiR00286.1	1	1	23.9538	22.5621
	ebv-miR-BART1-3p	nmiR00719.1	27.9402	1	1	1
	hsa-miR-633	nmiR00589.1	25.705	1	1	1
	hsa-miR-337-3p	nmiR00311.1	1	1	1	23.4645
	hsa-miR-200c	nmiR00228.1	1	1	1	22.5621
	ebv-miR-BART17-3p	nmiR00729.1	1	24.6025	1	1
	hsa-miR-605	nmiR00559.1	1	1	1	24.367
	hsa-miR-381	nmiR00352.1	1	1	1	26.172
	ebv-miR-BART17-5p	nmiR00730.1	1	1	1	22.5621
	kshv-miR-K12-9	nmiR00798.1	1	1	1	1
	hsa-miR-1322	nmiR00136.1	1	23.5774	1	1
	hsa-miR-1285	nmiR00106.1	1	1	24.9119	1
	hsa-miR-887	nmiR00654.1	1	1	22.0375	1
	hsa-miR-634	nmiR00590.1	1	1	1	1
	hsa-miR-1307	nmiR00130.1	1	1	1	1
	hsa-miR-518c	nmiR00441.2	1	1	22.0375	1
	hsa-miR-657	nmiR00614.1	1	1	1	1
	hsa-miR-220a	nmiR00252.1	1	24.6025	1	1
	hsa-miR-643	nmiR00599.1	1	1	1	1
	hsa-miR-601	nmiR00555.1	1	1	1	1
	hsa-miR-764	nmiR00716.1	1	1	22.9956	1
	hsa-miR-206	nmiR00233.1	1	1	1	1
	hsa-miR-559	nmiR00512.1	1	1	1	1
	hsa-miR-607	nmiR00561.1	1	1	1	22.5621
	hsa-miR-1303	nmiR00126.1	1	1	1	22.5621
	hsa-miR-2114	nmiR00701.1	1	1	1	1
	hcmv-miR-UL22A	nmiR00755.1	1	1	1	1
	hsa-miR-924	nmiR00667.1	1	1	1	1
	hsa-miR-487b	nmiR00391.1	1	1	1	37.0018
	hsa-miR-429	nmiR00367.2	1	1	1	1
	hsa-miR-663	nmiR00620.1	1	1	30.6608	1
	hsa-miR-1277	nmiR00097.1	1	1	1	1
	hsa-miR-1200	nmiR00029.1	1	28.703	1	1
	hsa-miR-192 (+++)	nmiR00211.1	28.5157	1	1	1
	hsa-miR-1978	nmiR00694.1	1	1	1	27.977
	hsa-miR-543	nmiR00477.1	1	1	1	1
	hsa-miR-28-3p	nmiR00267.1	1	27.6778	1	1
	hsa-miR-154	nmiR00177.1	1	1	1	1
	ebv-miR-BART19-3p	nmiR00733.1	26.8226	1	1	1
	hsa-miR-645	nmiR00601.1	1	26.6527	1	1
	hsv1-miR-H7	nmiR00778.1	1	1	1	1
	hsa-miR-623	nmiR00578.1	1	25.6276	1	1
	hsa-miR-202	nmiR00229.1	1	1	1	1
	hsa-miR-892a	nmiR00660.1	1	24.6025	1	1
	hsa-miR-1203	nmiR00032.1	1	24.6025	1	1
	hsa-miR-2113	nmiR00700.1	1	24.6025	1	1
	kshv-miR-K12-5	nmiR00793.1	1	24.6025	1	1
	mcv-miR-M1-5p	nmiR00800.1	1	24.6025	1	1
	hcmv-miR-UL36	nmiR00756.1	24.5874	1	1	1
	hsa-miR-488	nmiR00392.1	24.5874	1	1	1
	hsa-miR-1537	nmiR00174.1	1	1	1	1
	hsa-miR-431	nmiR00368.2	1	1	1	24.367
	hsa-miR-339-5p	nmiR00316.1	1	1	23.9538	1
	hsa-miR-576-5p	nmiR00529.1	23.4697	1	1	1
	hsa-miR-520b	nmiR00453.1	23.4697	1	1	1
	hsa-miR-2054	nmiR00698.1	23.4697	1	1	1
	hsa-miR-631	nmiR00587.1	1	1	1	23.4645
	hsa-miR-612	nmiR00566.1	1	1	22.9956	1
	hsa-miR-1283	nmiR00104.1	22.9277	1	1	1
	hsa-miR-760	nmiR00634.1	1	1	1	1
	hsa-miR-208b	nmiR00235.1	1	1	1	1
	hsa-miR-1226	nmiR00044.1	1	1	1	22.5621
	hsa-miR-557	nmiR00510.1	1	1	1	1
	hsa-miR-1825	nmiR00188.1	1	1	1	1
	hsa-miR-568	nmiR00519.1	1	1	1	1
	hsa-miR-513a-3p	nmiR00426.2	1	1	1	1
	hsa-miR-491-3p	nmiR00396.1	1	1	1	1
	hsa-miR-1973	nmiR00689.1	1	1	22.0375	1
	hsa-miR-508-5p	nmiR00418.1	1	1	22.0375	1
	ebv-miR-BART9	nmiR00749.1	1	1	1	1
	hsa-miR-1201	nmiR00030.1	1	1	1	1
	hcmv-miR-US25-2-5p	nmiR00761.1	1	1	1	1
	hsa-miR-556-3p	nmiR00508.1	1	1	1	1
	hsa-miR-509-5p	nmiR00421.1	1	1	1	1
	hsa-miR-205	nmiR00232.1	1	1	1	1
	hsa-miR-302b	nmiR00282.1	1	1	1	1
	hsa-miR-520c-3p	nmiR00454.1	1	1	1	21.6596
	hsv2-miR-H4-3p	nmiR00782.1	1	1	1	1
	hsa-miR-584	nmiR00538.1	1	1	1	1
	hsa-miR-1183	nmiR00025.1	1	1	1	1
	hsa-miR-220c	nmiR00254.1	1	1	1	1
	hsa-miR-153	nmiR00173.1	1	1	1	1
	hsa-miR-639	nmiR00595.1	1	1	1	1
	hsa-miR-589	nmiR00543.1	1	1	1	1
	hsa-miR-1469	nmiR00158.1	1	1	1	20.7571
	hsa-miR-342-5p	nmiR00321.1	1	1	1	1
	hsa-miR-150	nmiR00169.1	1	1	1	1
	hsa-miR-671-3p	nmiR00625.1	1	1	1	1
	hcmv-miR-US25-2-3p	nmiR00760.1	1	1	1	1
	hsa-miR-330-3p	nmiR00306.1	1	1	1	1
	hsa-miR-562	nmiR00514.1	1	1	1	1
	hiv1-miR-H1	nmiR00767.1	1	1	1	1
	hsa-miR-516b	nmiR00435.1	1	1	1	1
	hsa-miR-382	nmiR00353.1	1	1	1	1
	hsa-miR-525-3p	nmiR00466.1	1	1	1	1
	hsa-miR-28-5p	nmiR00268.1	1	1	1	1
	hsa-miR-625	nmiR00580.1	1	1	1	1
	hsa-miR-1257	nmiR00070.1	1	1	1	1
	hsa-miR-877	nmiR00649.1	1	1	1	1
	hsa-miR-219-1-3p	nmiR00248.1	1	1	1	1
	hsa-miR-599	nmiR00553.1	1	1	1	1
	hsa-miR-506	nmiR00415.2	1	1	1	1
	hsa-miR-1305	nmiR00128.1	1	1	1	1
	hsa-miR-548m	nmiR00496.2	1	1	1	1
	mcv-miR-M1-3p	nmiR00799.1	1	1	1	1
	kshv-miR-K12-10a+kshv-miR-K12-10b	nmiR00786.1	1	1	1	1
	hsa-miR-1258	nmiR00071.2	1	1	1	1
	hsa-miR-2277	nmiR00706.1	1	1	1	1
	hsa-miR-1268	nmiR00085.1	1	1	1	1
	hsa-miR-298	nmiR00272.1	1	1	1	1
	hsa-miR-518e	nmiR00443.1	1	1	1	1
	hsa-miR-200b	nmiR00227.2	1	1	1	1
	hsa-miR-938	nmiR00676.1	1	1	1	1
	hsa-miR-937	nmiR00675.1	1	1	1	1
	hsa-miR-1292	nmiR00113.1	1	1	1	1
	hsa-miR-299-5p	nmiR00274.1	1	1	1	1
	hcmv-miR-US25-1	nmiR00759.1	1	1	1	1
	hsa-miR-127-3p	nmiR00091.1	1	1	1	1
	hsa-miR-613	nmiR00567.1	1	1	1	1
	hsa-miR-1233	nmiR00049.1	1	1	1	1
	ebv-miR-BART2-5p	nmiR00736.1	1	1	1	1
	ebv-miR-BART5	nmiR00744.1	1	1	1	1
	hsa-miR-1251	nmiR00063.1	1	1	1	1
	hsa-miR-1185	nmiR00027.1	1	1	1	1
	hsa-miR-496	nmiR00402.2	1	1	1	1
	hsa-miR-505	nmiR00414.1	1	1	1	1
	hsa-miR-548o	nmiR00498.1	1	1	1	1
	hsa-miR-556-5p	nmiR00509.2	1	1	1	1
	hsa-miR-302d	nmiR00284.1	1	1	1	1
	hsa-miR-654-3p	nmiR00610.1	1	1	1	1
	hsa-miR-548j	nmiR00493.1	1	1	1	1
	hsa-miR-320d	nmiR00297.2	1	1	1	1
	hsa-miR-548b-5p	nmiR00483.1	1	1	1	1
	hsa-miR-380	nmiR00351.1	1	1	1	1
	hiv1-miR-TAR-3p	nmiR00769.1	1	1	1	1
	hsa-miR-654-5p	nmiR00611.1	1	1	1	1
	hsa-miR-545	nmiR00479.2	1	1	1	1
	hsa-miR-661	nmiR00618.1	1	1	1	1
	hsa-miR-1286	nmiR00107.1	1	1	1	1
	hsa-miR-1247	nmiR00059.1	1	1	1	1
	hsa-miR-330-5p	nmiR00307.1	1	1	1	1
	hsa-miR-653	nmiR00609.1	1	1	1	1
	hsa-miR-223	nmiR00257.1	1	1	1	1
	hsa-miR-141	nmiR00151.1	1	1	1	1
	hsa-miR-512-5p	nmiR00425.1	1	1	1	1
	hsa-miR-410	nmiR00358.1	1	1	1	1
	hsa-miR-33a	nmiR00317.1	1	1	1	1
	hsa-miR-888	nmiR00655.1	1	1	1	1
	hsa-miR-541	nmiR00474.1	1	1	1	1
	hsa-miR-520d-3p	nmiR00455.1	1	1	1	1
	hsa-miR-520f	nmiR00458.1	1	1	1	1
	hsa-miR-767-3p	nmiR00637.1	1	1	1	1
	hsa-miR-759	nmiR00713.1	1	1	1	1
	ebv-miR-BHRF1-3	nmiR00752.1	1	1	1	1
	hsa-miR-491-5p	nmiR00397.2	1	1	1	1
	hsa-miR-1538	nmiR00175.1	1	1	1	1
	hsa-miR-152	nmiR00172.1	1	1	1	1
	hsa-miR-1254	nmiR00066.1	1	1	1	1
	hsa-miR-1272	nmiR00089.1	1	1	1	1
	hsa-miR-1204	nmiR00033.1	1	1	1	1
	hsa-miR-450b-3p	nmiR00375.1	1	1	1	1
	hsa-miR-1197	nmiR00028.1	1	1	1	1
	hsa-miR-212	nmiR00241.1	1	1	1	1
	ebv-miR-BART21-3p	nmiR00739.1	1	1	1	1
	hsa-miR-515-5p	nmiR00432.1	1	1	1	1
	hsa-miR-513a-5p	nmiR00427.1	1	1	1	1
	hsa-miR-558	nmiR00511.1	1	1	1	1
	hsa-miR-1243	nmiR00055.1	1	1	1	1
	hsa-miR-632	nmiR00588.1	1	1	1	1
	hsa-miR-642	nmiR00598.1	1	1	1	1
	hsa-miR-326	nmiR00303.1	1	1	1	1
	hsa-miR-892b	nmiR00661.1	1	1	1	1
	hsa-miR-650	nmiR00606.1	1	1	1	1
	hsa-miR-1205	nmiR00034.1	1	1	1	1
	hsa-miR-637	nmiR00593.1	1	1	1	1
	hsa-miR-769-3p	nmiR00639.1	1	1	1	1
	ebv-miR-BHRF1-1	nmiR00750.1	1	1	1	1
	hcmv-miR-UL70-5p	nmiR00758.1	1	1	1	1
	hsv1-miR-H2-5p	nmiR00773.1	1	1	1	1
	hsa-miR-513b	nmiR00428.1	1	1	1	1
	hsa-miR-518d-3p	nmiR00442.1	1	1	1	1
	hsa-miR-875-3p	nmiR00645.2	1	1	1	1
	hsa-miR-549	nmiR00500.1	1	1	1	1
	hsa-miR-384	nmiR00355.1	1	1	1	1
	hsa-miR-563	nmiR00515.2	1	1	1	1
	hsa-miR-1231	nmiR00048.1	1	1	1	1
	hsa-miR-219-2-3p	nmiR00249.1	1	1	1	1
	hsa-miR-1255a	nmiR00067.1	1	1	1	1
	hsa-miR-675	nmiR00627.1	1	1	1	1
	hsa-miR-211	nmiR00240.1	1	1	1	1
	hsa-miR-874	nmiR00644.1	1	1	1	1
	hsa-miR-644	nmiR00600.1	1	1	1	1
	hsa-miR-483-5p	nmiR00384.1	1	1	1	1
	hsa-miR-1291	nmiR00112.1	1	1	1	1
	hsa-miR-486-3p	nmiR00388.1	1	1	1	1
	hsa-miR-375	nmiR00344.2	1	1	1	1
	hsa-miR-1256	nmiR00069.1	1	1	1	1
	hsa-miR-628-5p	nmiR00584.1	1	1	1	1
	hsa-miR-369-5p	nmiR00336.1	1	1	1	1
	hsa-miR-371-3p	nmiR00338.1	1	1	1	1
	hsa-miR-412	nmiR00360.1	1	1	1	1
	kshv-miR-K12-7	nmiR00796.1	1	1	1	1
	hsa-miR-2053	nmiR00697.1	1	1	1	1
	hsa-miR-616	nmiR00571.1	1	1	1	1
	hsv1-miR-H4-3p	nmiR00775.1	1	1	1	1
	hsa-miR-1236	nmiR00051.1	1	1	1	1
	hsa-miR-765	nmiR00635.1	1	1	1	1
	hsa-miR-582-3p	nmiR00535.2	1	1	1	1
	hsa-miR-516a-5p	nmiR00434.1	1	1	1	1
	hsa-miR-323-3p	nmiR00298.1	1	1	1	1
	hsa-miR-507	nmiR00416.1	1	1	1	1
	ebv-miR-BART11-3p	nmiR00722.1	1	1	1	1
	kshv-miR-K12-8	nmiR00797.1	1	1	1	1
	hsa-miR-193a-5p	nmiR00213.1	1	1	1	1
	ebv-miR-BART18-5p	nmiR00732.1	1	1	1	1
	hsa-miR-1321	nmiR00135.1	1	1	1	1
	hsa-miR-548d-5p	nmiR00487.1	1	1	1	1
	hsa-miR-548e	nmiR00488.1	1	1	1	1
	hsa-miR-1245	nmiR00057.1	1	1	1	1
	hsa-miR-2278	nmiR00707.1	1	1	1	1
	ebv-miR-BART14	nmiR00726.1	1	1	1	1
	hsa-miR-1294	nmiR00116.1	1	1	1	1
	ebv-miR-BART3	nmiR00742.1	1	1	1	1
	hsa-miR-1227	nmiR00045.1	1	1	1	1
	hsa-miR-299-3p	nmiR00273.2	1	1	1	1
	ebv-miR-BART7	nmiR00747.1	1	1	1	1
	hsa-miR-610	nmiR00564.1	1	1	1	1
	ebv-miR-BART20-3p	nmiR00737.1	1	1	1	1
	hsa-miR-548q	nmiR00709.1	1	1	1	1
	hsa-miR-433	nmiR00370.1	1	1	1	1
	hsa-miR-554	nmiR00506.1	1	1	1	1
	hsa-miR-511	nmiR00423.1	1	1	1	1
	hsa-miR-638	nmiR00594.1	1	1	1	1
	bkv-miR-B1-3p+jcv-miR-J1-3p	nmiR00717.1	1	1	1	1
	ebv-miR-BART20-5p	nmiR00738.1	1	1	1	1
	hsa-miR-921	nmiR00664.2	1	1	1	1
	hsa-miR-1911	nmiR00206.1	1	1	1	1
	hsa-miR-659	nmiR00616.2	1	1	1	1
	hsa-miR-602	nmiR00556.1	1	1	1	1
	hsa-miR-636	nmiR00592.1	1	1	1	1
	ebv-miR-BART13	nmiR00725.1	1	1	1	1
	hsa-miR-146b-3p	nmiR00160.2	1	1	1	1
	hsa-miR-564	nmiR00516.1	1	1	1	1
	hsa-miR-372	nmiR00340.1	1	1	1	1
	hsa-miR-762	nmiR00715.1	1	1	1	1
	hsa-miR-483-3p	nmiR00383.1	1	1	1	1
	hsa-miR-761	nmiR00714.1	1	1	1	1
	hsa-miR-220b	nmiR00253.1	1	1	1	1
	hsa-miR-139-5p	nmiR00148.1	1	1	1	1
	hsa-miR-548l	nmiR00495.1	1	1	1	1
	hsa-miR-519c-3p	nmiR00448.1	1	1	1	1
	hsa-miR-517a	nmiR00436.1	1	1	1	1
	hsa-miR-1913	nmiR00208.1	1	1	1	1
	hsa-miR-711	nmiR00711.1	1	1	1	1
	hsa-miR-933	nmiR00671.1	1	1	1	1
	hsa-miR-1259	nmiR00072.1	1	1	1	1
	hsa-miR-1301	nmiR00124.1	1	1	1	1
	hsa-miR-518b	nmiR00440.1	1	1	1	1
	hsa-miR-1910	nmiR00205.1	1	1	1	1
	hsa-miR-668	nmiR00624.1	1	1	1	1
	hsa-miR-593	nmiR00548.1	1	1	1	1
	hsa-miR-550	nmiR00501.1	1	1	1	1
	hsa-miR-432	nmiR00369.1	1	1	1	1
	hcmv-miR-US4	nmiR00764.1	1	1	1	1
	hsv2-miR-H4-5p	nmiR00783.1	1	1	1	1
	hsa-miR-338-5p	nmiR00314.1	1	1	1	1
	hsa-miR-1976	nmiR00692.1	1	1	1	1
	hsa-miR-1182	nmiR00024.1	1	1	1	1
	hsa-miR-665	nmiR00623.1	1	1	1	1
	hsa-miR-2116	nmiR00703.1	1	1	1	1
	hsa-miR-1827	nmiR00190.1	1	1	1	1
	hsa-miR-367	nmiR00334.1	1	1	1	1
	hsa-miR-658	nmiR00615.2	1	1	1	1
	hsa-miR-944	nmiR00682.1	1	1	1	1
	hsa-miR-297	nmiR00271.1	1	1	1	1
	hsa-miR-1253	nmiR00065.1	1	1	1	1
	hsa-miR-583	nmiR00537.1	1	1	1	1
	hsa-miR-1263	nmiR00080.1	1	1	1	1
	hsa-miR-1293	nmiR00114.2	1	1	1	1
	hsa-miR-1269	nmiR00086.1	1	1	1	1
	hsa-miR-596	nmiR00550.1	1	1	1	1
	hsa-miR-1250	nmiR00062.1	1	1	1	1
	hsa-miR-889	nmiR00656.1	1	1	1	1
	hsa-miR-198	nmiR00220.1	1	1	1	1
	hsa-miR-520a-5p	nmiR00452.1	1	1	1	1
	hsa-miR-187	nmiR00195.1	1	1	1	1
	hsa-miR-934	nmiR00672.2	1	1	1	1
	hsa-miR-1284	nmiR00105.1	1	1	1	1
	kshv-miR-K12-4-3p	nmiR00791.1	1	1	1	1
	hsa-miR-586	nmiR00540.1	1	1	1	1
	hsa-miR-553	nmiR00505.2	1	1	1	1
	hsa-miR-567	nmiR00518.1	1	1	1	1
	hsa-miR-296-3p	nmiR00269.1	1	1	1	1
	kshv-miR-K12-3	nmiR00790.1	1	1	1	1
	hsa-miR-548c-5p	nmiR00485.1	1	1	1	1
	hsa-miR-614	nmiR00568.1	1	1	1	1
	hsa-miR-671-5p	nmiR00626.2	1	1	1	1
	hsa-miR-127-5p	nmiR00095.1	1	1	1	1
	hsa-miR-622	nmiR00577.1	1	1	1	1
	hsa-miR-524-3p	nmiR00464.1	1	1	1	1
	ebv-miR-BART4	nmiR00743.1	1	1	1	1
	hsa-miR-718	nmiR00712.1	1	1	1	1
	bkv-miR-B1-5p	nmiR00718.1	1	1	1	1
	hsa-miR-935	nmiR00673.1	1	1	1	1
	hsa-miR-329	nmiR00305.1	1	1	1	1
	kshv-miR-K12-2	nmiR00789.1	1	1	1	1
	hcmv-miR-US33-5p	nmiR00763.1	1	1	1	1
	hsa-miR-587	nmiR00541.1	1	1	1	1
	hsa-miR-1296	nmiR00119.1	1	1	1	1
	hsa-miR-662	nmiR00619.1	1	1	1	1
	hsa-miR-147b	nmiR00165.1	1	1	1	1
	ebv-miR-BART6-3p	nmiR00745.1	1	1	1	1
	hsa-miR-648	nmiR00604.1	1	1	1	1
	hsa-miR-451	nmiR00377.1	1	1	1	1
	hsa-miR-371-5p	nmiR00339.1	1	1	1	1
	hsa-miR-578	nmiR00531.1	1	1	1	1
	hsa-miR-1244	nmiR00056.1	1	1	1	1
	hsa-miR-606	nmiR00560.1	1	1	1	1
	hsa-miR-1914	nmiR00209.1	1	1	1	1
	hsv1-miR-H2-3p	nmiR00772.1	1	1	1	1
	hsa-miR-485-5p	nmiR00387.1	1	1	1	1
	hsa-miR-1302	nmiR00125.1	1	1	1	1
	ebv-miR-BART19-5p	nmiR00734.1	1	1	1	1
	hsa-miR-647	nmiR00603.1	1	1	1	1
	hsv2-miR-H3	nmiR00781.1	1	1	1	1
	ebv-miR-BART22	nmiR00741.1	1	1	1	1
	ebv-miR-BART1-5p	nmiR00720.1	1	1	1	1
	hsa-miR-1289	nmiR00110.1	1	1	1	1
	hsa-miR-2110	nmiR00699.1	1	1	1	1
	hsa-miR-1470	nmiR00163.1	1	1	1	1
	hsa-miR-129-5p	nmiR00118.1	1	1	1	1
	hcmv-miR-UL112	nmiR00753.1	1	1	1	1
	hsa-miR-1909	nmiR00202.1	1	1	1	1
	hsa-miR-604	nmiR00558.1	1	1	1	1
	hsa-miR-1290	nmiR00111.1	1	1	1	1
	hsa-miR-129-3p	nmiR00115.1	1	1	1	1
	hsa-miR-1323	nmiR00137.1	1	1	1	1
	hsa-miR-886-3p	nmiR00652.1	1	1	1	1
	hcmv-miR-UL148D	nmiR00754.1	1	1	1	1
	hsa-miR-588	nmiR00542.1	1	1	1	1
	hsa-miR-1228	nmiR00046.1	1	1	1	1
	hsa-miR-624	nmiR00579.1	1	1	1	1
	hsa-miR-885-3p	nmiR00650.1	1	1	1	1
	hsa-miR-124	nmiR00054.1	1	1	1	1
	hsa-miR-1281	nmiR00102.1	1	1	1	1
	hsa-miR-510	nmiR00422.1	1	1	1	1
	hsa-miR-1278	nmiR00098.1	1	1	1	1
	ebv-miR-BART12	nmiR00724.1	1	1	1	1
	hsa-miR-1280	nmiR00101.2	1	1	1	1
	hsa-miR-936	nmiR00674.1	1	1	1	1
	hsa-miR-548p	nmiR00499.2	1	1	1	1
	hsa-miR-512-3p	nmiR00424.1	1	1	1	1
	hsa-miR-504	nmiR00413.1	1	1	1	1
	hsa-miR-489	nmiR00393.1	1	1	1	1
	hsa-miR-449c	nmiR00708.1	1	1	1	1
	hsa-miR-2052	nmiR00696.1	1	1	1	1
	hsa-miR-184	nmiR00192.1	1	1	1	1
	hsa-miR-1306	nmiR00129.1	1	1	1	1
	hsa-miR-509-3-5p	nmiR00419.1	1	1	1	1
	hsa-miR-939	nmiR00677.1	1	1	1	1
	ebv-miR-BART15	nmiR00727.1	1	1	1	1
	hsa-miR-922	nmiR00665.1	1	1	1	1
	ebv-miR-BART11-5p	nmiR00723.1	1	1	1	1
	hsa-miR-499-3p	nmiR00405.1	1	1	1	1
	hsa-miR-548k	nmiR00494.1	1	1	1	1
	hsa-miR-193a-3p	nmiR00212.1	1	1	1	1
	hsa-miR-494	nmiR00400.1	1	1	1	1
	hsa-miR-579	nmiR00532.1	1	1	1	1
